# Supplementary figures and images for: A sequence-based two-level method for the prediction of type I secreted RTX proteins
Source: Royal Society of Chemistry journal article supplement (doi:10.1039/c5an00311c), 2015-01-01

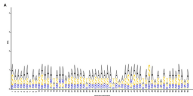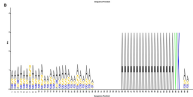

Supplement: c5an00311c1.pdf [file c5an00311c1.pdf]
